# Supplementary material for: Raman Spectroscopy in Colorectal Cancer Diagnostics: Comparison of PCA-LDA and PLS-DA Models
Source: Hindawi journal article supplement (doi:10.1155/2016/1603609), 2016-01-01
Supplement: f1 [file 1603609.f1.pdf]

## Supporting Information

### Raman spectroscopy in colorectal cancer diagnostics: Comparison of PCA-LDA and PLS-DA models

Wenjing LIU,\*\*\* Zhaotian SUN, \*\*\* Jinyu CHEN,\*\*\*\* and Chuanbo JING\*\*\*†

\* State Key Laboratory of Environmental Chemistry and Ecotoxicology, Research Center for Eco-Environmental Sciences, Chinese Academy of Sciences, Beijing 100085, China

\*\* University of Chinese Academy of Sciences, Beijing 100049, China

\*\*\* No. 4 Hospital, Jinan 250031, China

\*\*\*\* National Center for Mathematics and Interdisciplinary Sciences, Academy of Mathematics and Systems Science, Chinese Academy of Sciences, Beijing 100190, China

**Table S1.** Peak assignments of vibrational bands of human colorectal tissue from Raman spectra.

| Colorectal tissues          |       | Peak Assignment                                                             |
|-----------------------------|-------|-----------------------------------------------------------------------------|
| Wavenumber/cm <sup>-1</sup> |       |                                                                             |
| Normal                      | Tumor |                                                                             |
|                             | 890   | Lipids/carbohydrates/collagen<br>C–C–N <sup>+</sup> , C–O–C ring, C–C       |
|                             | 1002  | Phenylalanine                                                               |
| 1063                        | 1063  | Lipids/collagen, C–C str                                                    |
| 1134                        | 1134  | Fatty acid (C–C str.)/proteins (C–C/C–N str.)                               |
| 1174                        | 1172  | L-Tryptophan                                                                |
|                             | 1243  | Phospholipid, O–P–O antisym. str                                            |
| 1297                        | 1297  | Lipids, phospholipids, C–H <sub>2</sub> twist                               |
|                             | 1371  | Lipids CH <sub>3</sub> sym. bend, lipids                                    |
| 1414                        | 1419  | Lipids N <sup>+</sup> (CH <sub>3</sub> ) <sub>3</sub> sym. bend             |
| 1442                        | 1442  | Fatty acids, triglycerides, CH <sub>2</sub> or CH <sub>3</sub> deformations |
| 1461                        | 1461  | Lipids/proteins C–H wag, CH <sub>2</sub> or CH <sub>3</sub> def.            |
|                             | 1663  | Proteins Amide I $\alpha$ helix, C=O                                        |
| 2726                        | 2729  | C–H stretching                                                              |
| 2847                        | 2847  | Fatty acids, triglycerides, C–H <sub>2</sub> sym. str                       |
| 2879                        | 2879  | Lipids, C–H <sub>2</sub> antisym. str.                                      |
| 2927                        | 2927  | Proteins/lipids, CH <sub>3</sub> sym. str                                   |
|                             | 2966  | C–H <sub>2</sub> stretching                                                 |
|                             | 3068  | Nucleic acids/proteins, C–H aromatic                                        |

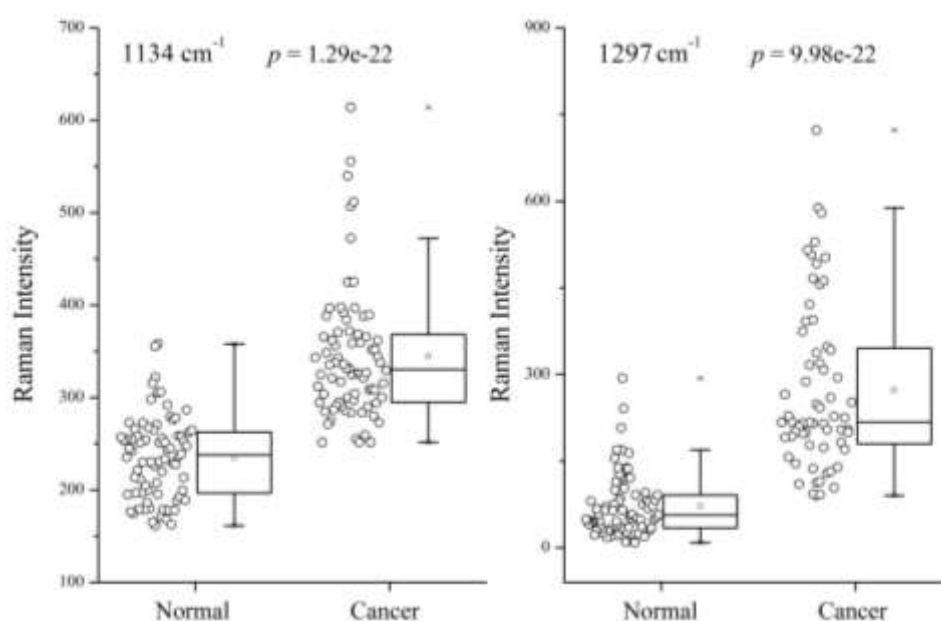

**Figure S1.** Box charts of the intensity of Raman bands at 1134 and 1297  $\text{cm}^{-1}$  from normal and cancerous tissues. The line within each box represents the median, while the lower and upper boundaries of the box indicate the first (25th percentile) and the third (75th percentile) quartiles, respectively. Error bars (whiskers) represent the 1.5-fold interquartile range.

The intensity of Raman bands at 1134  $\text{cm}^{-1}$  (C–C/C–N stretching vibration) and 1297  $\text{cm}^{-1}$  (C–H<sub>2</sub> twisting vibration) was measured for normal and cancer groups. The independent-sample t-test was performed to evaluate the intensity change between these two groups. As shown in Figure S1, the average values of peak intensities at 1134  $\text{cm}^{-1}$  (314.96) and 1297  $\text{cm}^{-1}$  (272.79) in the cancer group are higher than those in the control group (235.15 and 72.22), respectively. The *p* values of peak intensities at 1134 ( $p_{1134}= 1.29\text{e-}22$ ) and 1297  $\text{cm}^{-1}$  ( $p_{1297}= 9.98\text{e-}22$ ) are less than 0.05. Thus, the peak intensities at 1134 and 1297  $\text{cm}^{-1}$  increased significantly in cancerous tissue, relative to the normal tissue.

**Table S2.** Comparison of diagnostic performance of PCA-LDA and PLS-DA models for differentiating cancerous from normal colorectal tissues.

| Raman spectroscopy model | Accuracy | Sensitivity | Specificity |
|--------------------------|----------|-------------|-------------|
| PCA-LDA                  | 79.2%    | 72.8%       | 85.9%       |
| PLS-DA                   | 84.3%    | 77.7%       | 91.0%       |
